# Supplementary material for: The Breadth of the Neutralizing Antibody Response to Original SARS-CoV-2 Infection is Linked to the Presence of Long COVID Symptoms
Source: PubMed Central journal article supplement (PMC10081395; doi:10.1101/2023.03.30.23287923), 2023-03-31
Supplement: NIHPP2023.03.30.23287923V1-supplement-1.pdf [file NIHPP2023.03.30.23287923V1-supplement-1.pdf]

500 SUPPLEMENTARY MATERIALS

501

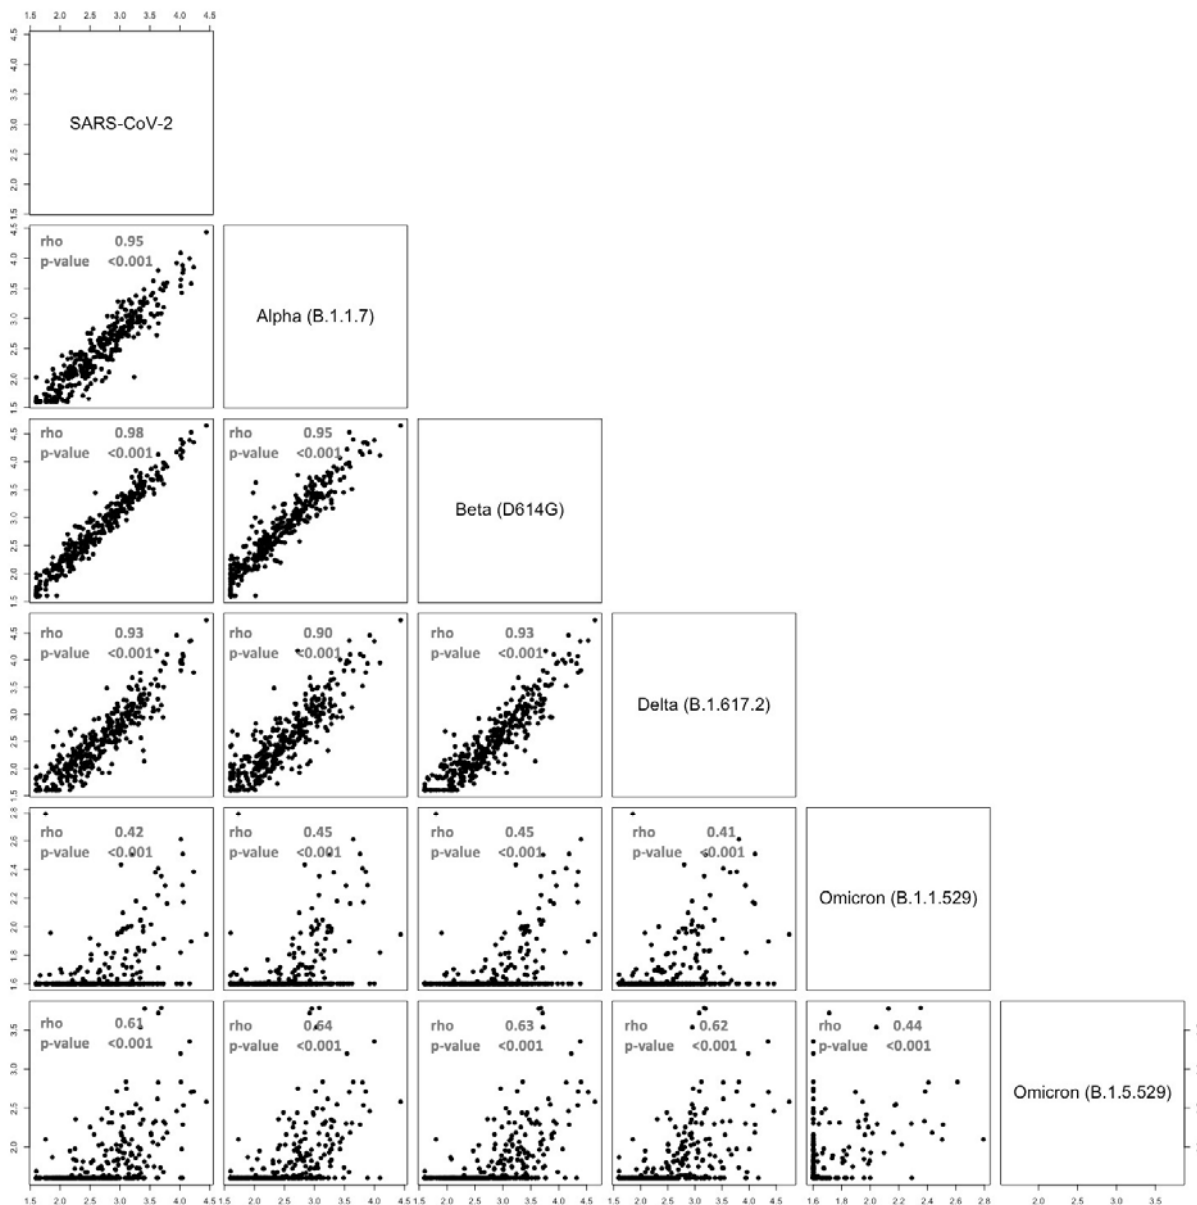

502

503 **Supplementary Figure 1. Correlation Matrix of Neutralization ID50s For SARS-CoV-2 variants**

504 **tested.** Data across all time points are shown in the matrices. R and P values from non-parametric

505 Spearman rank correlation analyses.

506

507

508

509

510

511

512  
513

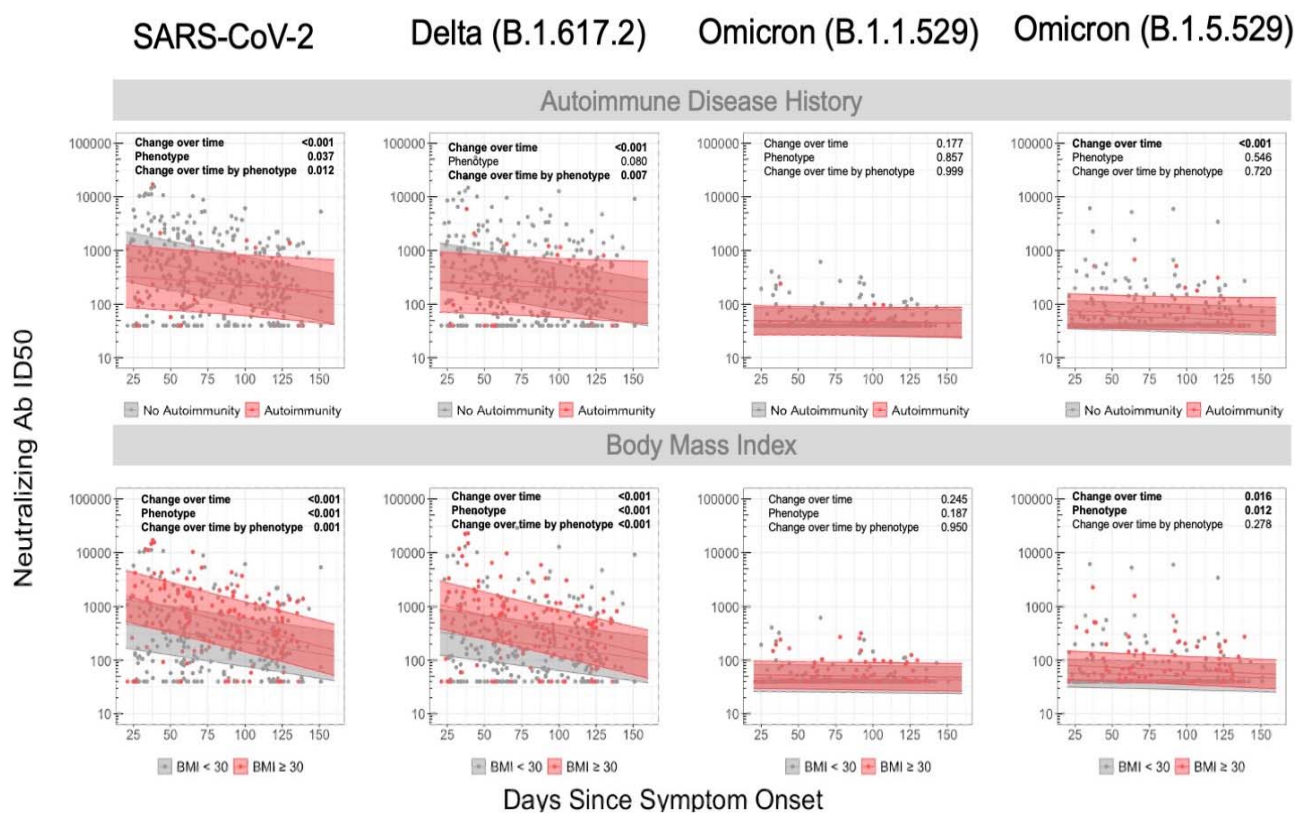

514  
515  
516  
517  
518  
519  
520  
521  
522  
523  
524  
525  
526

**Supplementary Figure 2. Longitudinal analysis of antibody neutralization by clinical factors and SARS-CoV-2 variant.** Mixed-linear regression model with two covariates (body mass index and autoimmune disease history) for different variants: SARS-CoV-2, B.1.617.2, B.1.1.529 and BA.4/5. P-values denote if a significant difference was observed for change in antibody neutralization over time (Change over time), between subgroup (Phenotype, e.g., BMI  $\geq$  30), and difference in change over time by subgroup (Change over time by phenotype). Shaded region represents 95% confidence intervals around the median line.

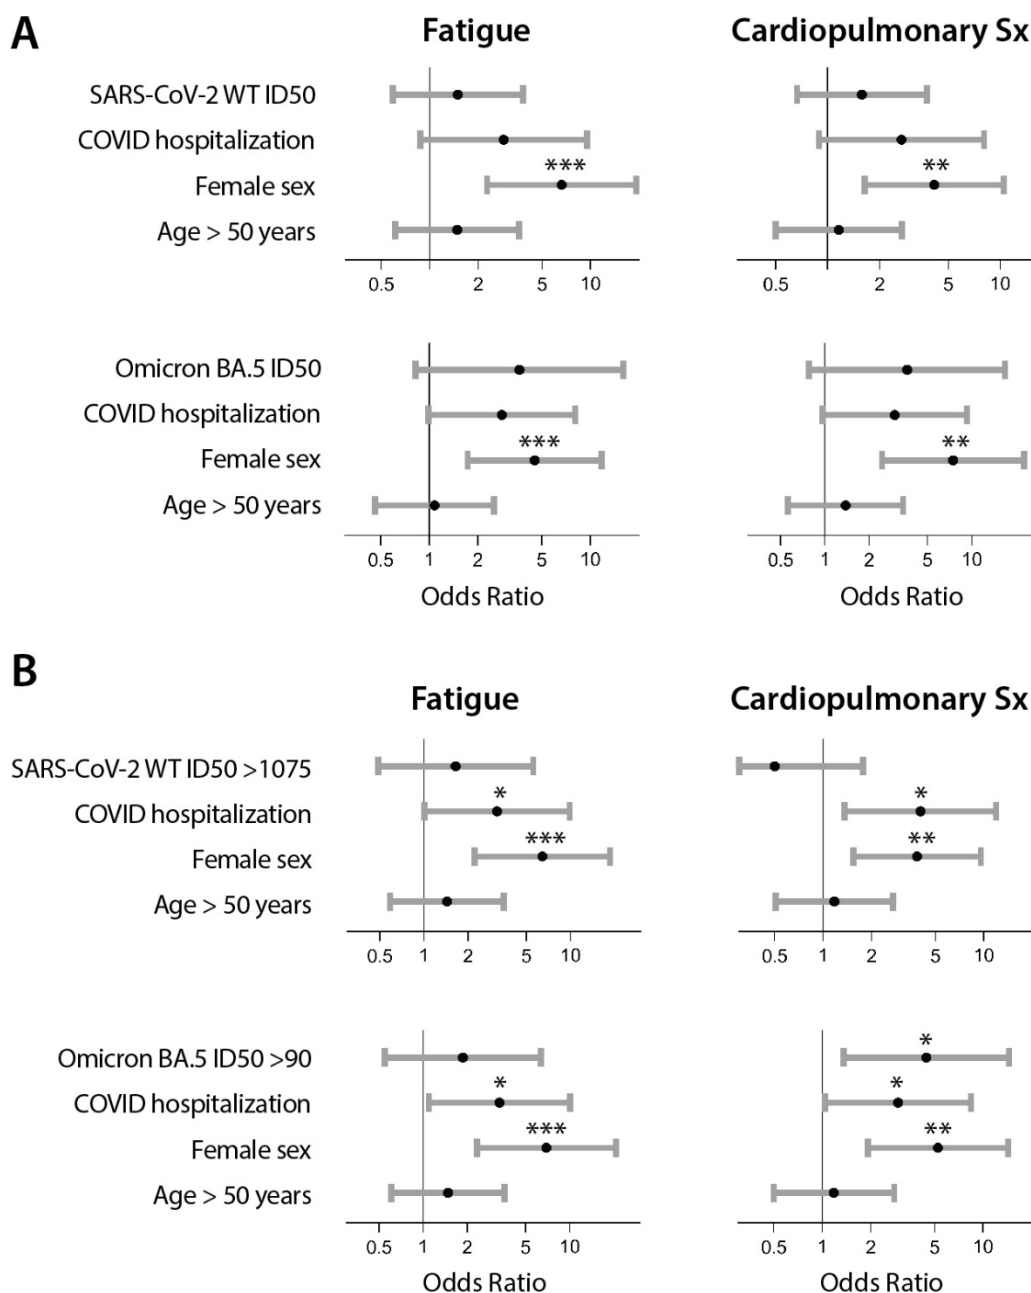

527  
528  
529  
530  
531  
532  
533  
534  
535  
536  
537  
538  
539

**Supplementary Figure 3. Association between SARS-CoV-2 neutralization, hospitalization during acute infection and demographic factors and the odds of experiencing fatigue or cardiopulmonary symptoms approximately four months following acute COVID-19.** The top panel shows odds ratios (points) and 95% confidence intervals (bars) for each variable included in logistic regression models using continuous neutralization ID50 values for assays using the original and Omicron BA.5 pseudoviruses (A). The bottom panel shows odds ratios and 95% confidence intervals of developing PASC or specific PASC phenotypes for logistic regression models incorporating a binary variable indicating if a sample had a neutralization ID50 in the top 15% of the cohort to either original SARS-CoV2 or Omicron BA.5 pseudoviruses (B). \*P<0.05, \*\*P<0.01, \*\*\*P<0.001 from covariate adjusted logistic regression.

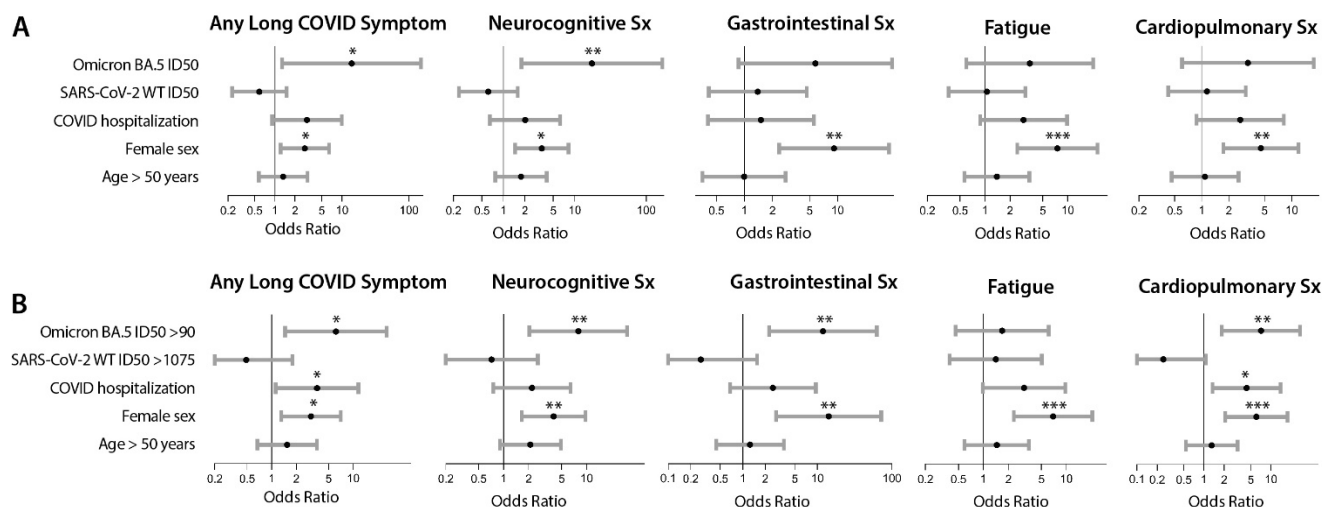

540  
541  
542  
543  
544  
545  
546  
547  
548  
549  
550  
551  
552

**Supplementary Figure 4. Association between SARS-CoV-2 neutralization, hospitalization during acute infection and demographic factors and the odds of experiencing fatigue or cardiopulmonary symptoms approximately four months following acute COVID-19.** The top panel shows odds ratios (points) and 95% confidence intervals (bars) for each variable included in logistic regression using continuous neutralization ID50 values for assays using the original and Omicron BA.5 pseudoviruses in the same model (A). The bottom panel shows odds ratios and 95% confidence intervals of developing PASC or specific PASC phenotypes for logistic regression incorporating a binary variable indicating if a sample had a neutralization ID50 in the top 15% of the cohort to the original SARS-CoV2 and Omicron BA.5 pseudoviruses (B). \*P<0.05, \*\*P<0.01, \*\*\*P<0.001 from covariate adjusted logistic regression.
